# Supplementary material for: The effect of MgO in Pd/Al2O3–MgO catalyst on a selective hydrogenation reaction
Source: Royal Society of Chemistry journal article supplement (doi:10.1039/d3cy01086d), 2023-12-14
Supplement: d3cy01086d1.pdf [file d3cy01086d1.pdf]

## The effects of MgO in the Pd/Al<sub>2</sub>O<sub>3</sub>-MgO catalyst toward selective hydrogenation reaction

Zhou Yang<sup>a</sup>, Ru Wang<sup>a</sup>, Hongji Liu<sup>a</sup>, Zhou Chen<sup>b</sup>, Xiaoli Hu<sup>c,\*</sup>, Limin Sun<sup>c</sup>, Weikun Lai<sup>a</sup>, Yunyun Dong<sup>d</sup>, Weiping Fang<sup>a,\*</sup>, and Xiaodong Yi<sup>a,\*</sup>

<sup>a</sup> State Key Laboratory of Physical Chemistry of Solid Surfaces, College of Chemistry and Chemical Engineering, Xiamen University, Xiamen 361005, China

<sup>b</sup> College of Materials, Xiamen University, Xiamen 361005, P. R. China.

<sup>c</sup> Petro China Lanzhou Petrochemical Research Center, Gansu, Lanzhou, 730000, China

<sup>d</sup> College of Chemistry and Chemical Engineering, Liaocheng University, Liaocheng 252059, P. R. China

\* Corresponding author: [xdyi@xmu.edu.cn](mailto:xdyi@xmu.edu.cn) (X. D. Yi),

[wpfang@xmu.edu.cn](mailto:wpfang@xmu.edu.cn) (W. P. Fang),

[huxiaoli6@petrochina.com.cn](mailto:huxiaoli6@petrochina.com.cn) (X. L. Hu),

Lead contact: [xdyi@xmu.edu.cn](mailto:xdyi@xmu.edu.cn) (X. D. Yi).

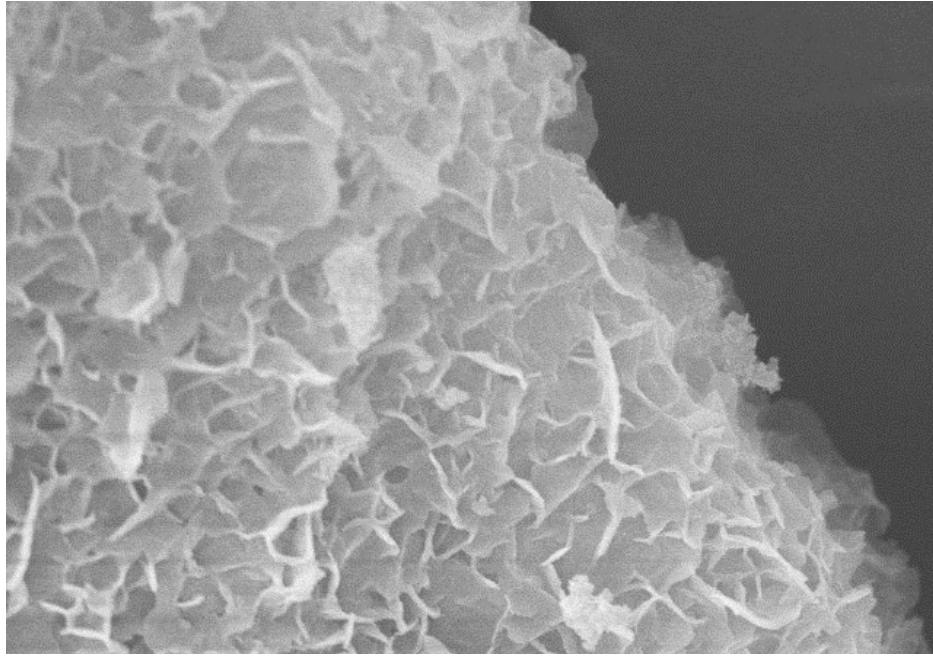

**Figure S1.** SEM image of Pd/Al<sub>2</sub>O<sub>3</sub>-0.12MgO.

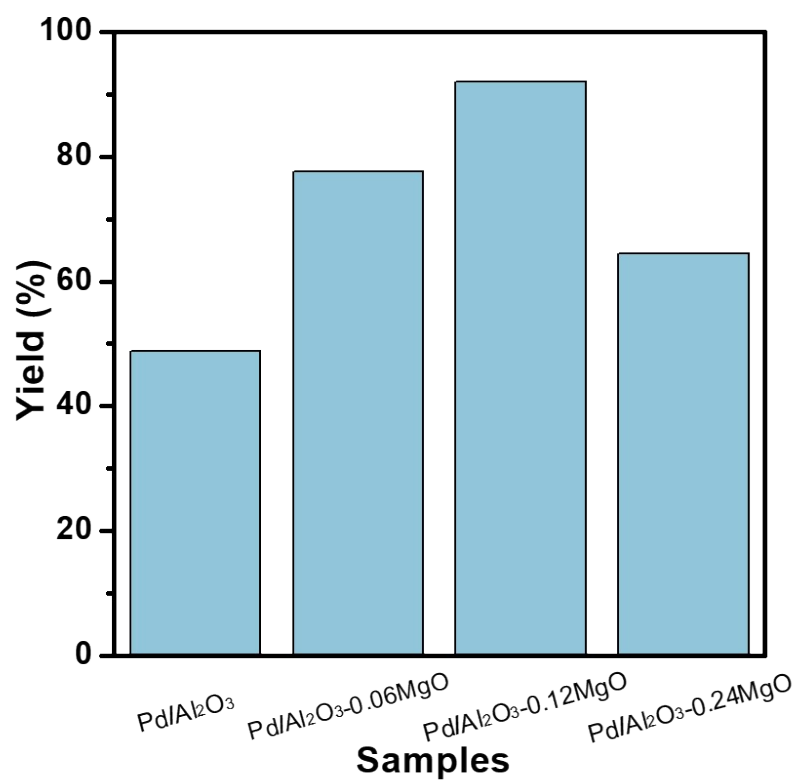

**Figure S2.** The product yield of selective hydrogenation of isoprene over different catalysts. [Reaction conditions: 60 °C, H<sub>2</sub> pressure 1.0 MPa, LHSV 20 h<sup>-1</sup>, H<sub>2</sub>/liquid (V/V) 200].

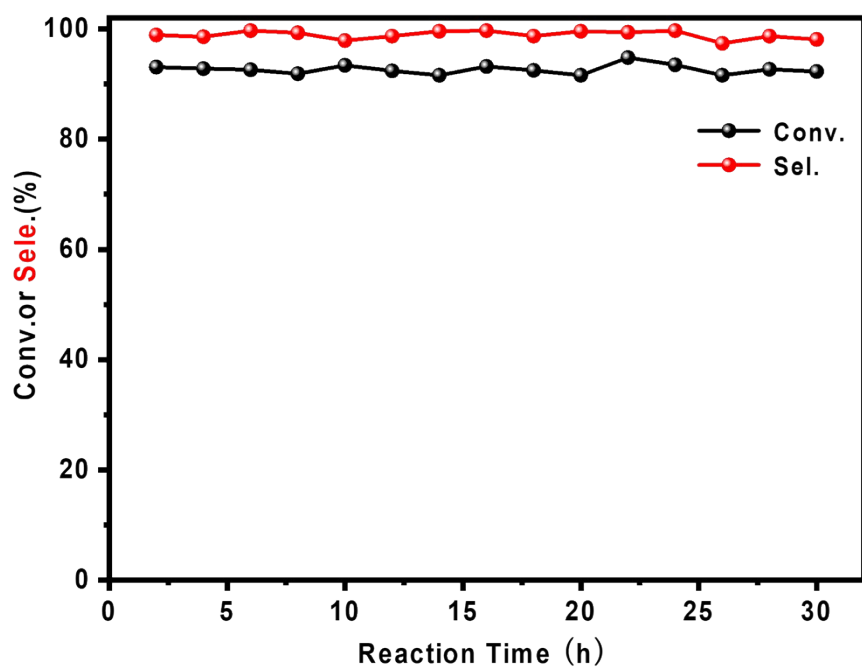

**Figure S3.** Long-term test for the selective hydrogenation of isoprene over Pd/Al<sub>2</sub>O<sub>3</sub>-0.12MgO. [Reaction conditions: 60 °C, H<sub>2</sub> pressure 1.0 MPa, LHSV 20 h<sup>-1</sup>, H<sub>2</sub>/liquid (V/V) 200].

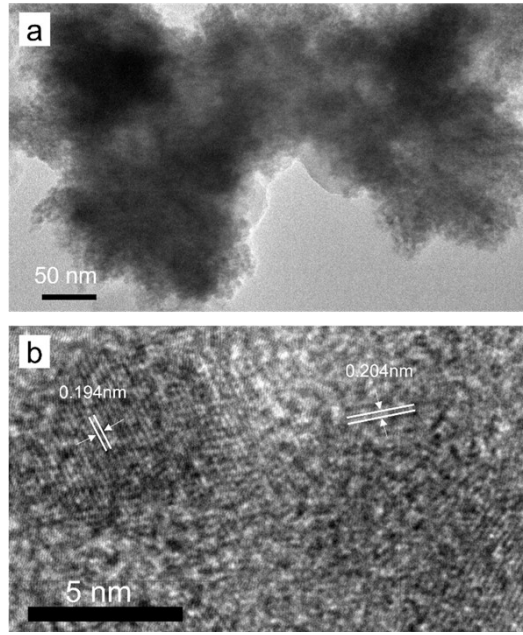

**Figure S4.** TEM (a) and high-resolution TEM (b) images of Pd/Al<sub>2</sub>O<sub>3</sub>-0.12MgO.

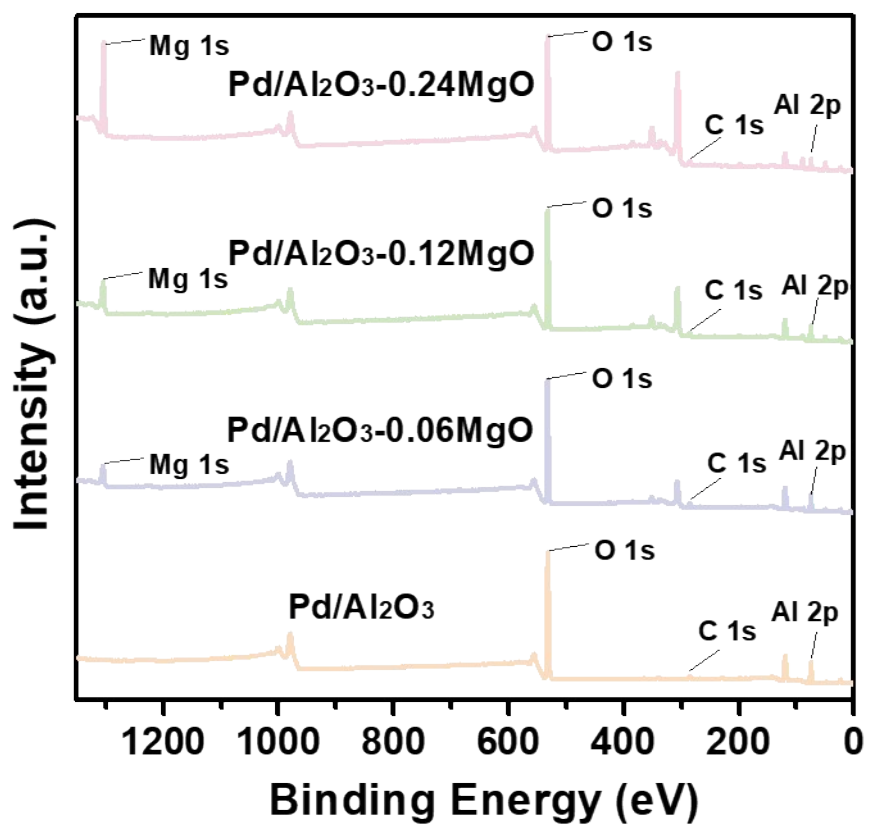

**Figure S5.** The full XPS spectrum of four different supports.

**Table S1.** The reaction rates (R) and turnover frequencies (TOF) of Pd/Al<sub>2</sub>O<sub>3</sub> based catalysts.

| Catalysts                                  | R(mmol • h <sup>-1</sup> ) | TOF(h <sup>-1</sup> ) |
|--------------------------------------------|----------------------------|-----------------------|
| Pd/Al <sub>2</sub> O <sub>3</sub>          | 0.011                      | 5642                  |
| Pd/Al <sub>2</sub> O <sub>3</sub> -0.06MgO | 0.016                      | 8623                  |
| Pd/Al <sub>2</sub> O <sub>3</sub> -0.12MgO | 0.019                      | 9901                  |
| Pd/Al <sub>2</sub> O <sub>3</sub> -0.24MgO | 0.012                      | 6600                  |

**Table S2.** Comparison of catalytic performance of semi-hydrogenation reaction.

| Catalysts                                          | Reaction conditions | Conversion | Selectivity | Ref.      |
|----------------------------------------------------|---------------------|------------|-------------|-----------|
| Pd/Al <sub>2</sub> O <sub>3</sub> -0.12MgO         | 60 °C/1.0 MPa       | 93%        | 99%         | this work |
| PdAgCu                                             | 100°C/2.0MPa        | 98%        | 92%         | [1]       |
| Pd/CNA-4                                           | 60 °C/1.0 MPa       | 89%        | 98%         | [2]       |
| NiMo-2/Al <sub>2</sub> O <sub>3</sub>              | 110°C/2.0MPa        | 93%        | 99%         | [3]       |
| ThNi <sub>2</sub> / Al <sub>2</sub> O <sub>3</sub> | 100°C/0.26MPa       | 44%        | 95%         | [4]       |

## References

- [1] J. Sun, H. Xu, H. Ma, X. Zhan, J. Zhu, D. Cheng, Isoprene selective hydrogenation using AgCu-promoted Pd nanoalloys, *Faraday Discussions*, 242 (2023) 418-428.
- [2] X. Yu, Y. Zhan, T. Fan, Y. Zhang, S. Liang, L. Sun, X. Hu, W. Fang, Z. Chen, X. Yi, Encapsulating Pd/g-C<sub>3</sub>N<sub>4</sub> with acrylic acid to enhance the catalytic partial hydrogenation performance of isoprene, *Carbon*, 201 (2023) 1174-1183.
- [3] A.A. Salomatina, K.A. Nadeina, O.V. V. Klimov, I.G. Danilova, E.Y. Gerasimov, I.P. Prosvirin, V.P. Pakharukova, Y.A. Chesalov, A.S. Noskov, Influence of Ni/Mo Ratio on Structure Formation of Ni-Mo Complex Compounds in NiMo/Al<sub>2</sub>O<sub>3</sub> Catalysts for Selective Diene Hydrogenation, *Energy & Fuels*, 36 (2022) 15088-15099.
- [4] J.B. Branco, A.P. Goncalves, A.P. de Mato, Isoprene gas phase hydrogenation catalyzed by ThNi<sub>2</sub> and UNi<sub>2</sub>, *Journal of Alloys and Compounds*, 465 (2008) 361-366.
